# Supplementary material for: A new and accurate expression for the radial distribution function of confined Lennard-Jones fluid in carbon nanotubes
Source: Royal Society of Chemistry journal article supplement (doi:10.1039/c5ra16151g), 2015-01-01
Supplement: c5ra16151g1.pdf [file c5ra16151g1.pdf]

## Supporting Information

### 1- Details of the fitting

We have calculated the Ar-Ar and Ar-C RDFs of the confined atoms into the (33,0) CNT as a function of reduced separation in the reduced temperature and density ranges from  $5.2 \leq T^* \leq 10.4$  and  $1.58 \leq \rho_{\text{mix}}^* \leq 1.66$  using the MD simulation. Then, we have fitted the calculated RDFs at two ranges of the reduced separation ( $x$ ) to the following equations using the Sigmaplot software:<sup>26</sup>

$$g_a = s \exp\left[-\left(m x + n\right)^4\right] \quad x \leq 1 \quad (1)$$

$$g_b = 1 + (x)^{-4} \exp\left[-\left(a x + b\right)\right] \sin\left[\left(c x + d\right)\right] + (x)^{-4} \exp\left[-\left(q x + h\right)\right] \cos\left[\left(k x + l\right)\right] \quad x > 1 \quad (2)$$

where  $g$  represents the RDF and  $a, b, c, d, q, h, k, l, m, n,$  and  $s$  are the adjustable parameters. In order to fit the data using the Sigmaplot, it is necessary to define Eqs. (1) and (2) in the "User defined" section in the "Dynamic fit wizards". The  $R^2$  values can be checked in a report page. Figure S1 shows the fitted lines for the Ar-Ar RDF on the two different ranges of  $x$ :

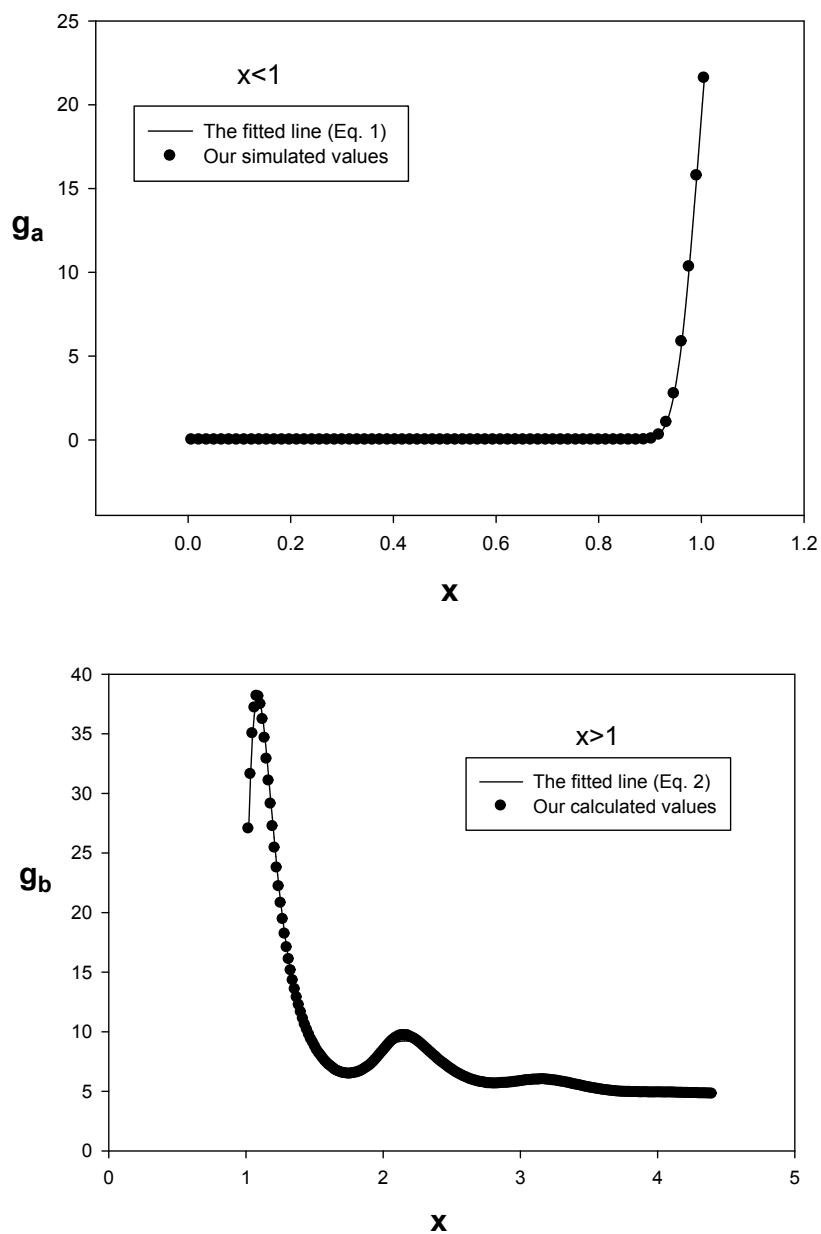

**Fig. S1.** Comparison between the fitted line and the simulated data at two different ranges of  $x$ .

The adjustable parameters  $a$ ,  $b$ ,  $c$ ,  $d$ ,  $q$ ,  $h$ ,  $k$ ,  $l$ ,  $m$ ,  $n$ , and  $s$  and their values along with the  $R^2$  values for the Ar-Ar and Ar-C RDFs have been presented in Tables S1 and S2.

**Table S1.** The values of the parameters of the Eqs. (1) and (2) for the Ar-Ar RDFs.

| $T^*$  | $\rho_{\text{mix}}^*$ | $s_1$   | $m_1$   | $n_1$  | $R^2$   | $a_1$   | $b_1$   | $c_1$    | $d_1$     | $q_1$   | $h_1$    | $k_1$     | $l_1$      | $R^2$  |
|--------|-----------------------|---------|---------|--------|---------|---------|---------|----------|-----------|---------|----------|-----------|------------|--------|
| 5.2015 | 1.6181                | 22.6225 | -6.0165 | 6.6844 | 1.0000  | -0.6598 | -4.6476 | 27.1831  | -31.3309  | 2.4231  | -6.4151  | -235.0714 | -432.7753  | 0.9988 |
|        | 1.6001                | 23.2819 | -6.0188 | 6.6840 | 1.0000  | -0.7183 | -4.4130 | 30.3193  | -33.4924  | 2.0477  | -5.8316  | -261.0638 | -1850.3089 | 0.9985 |
|        | 1.5908                | 24.1053 | -6.0314 | 6.6925 | 1.0000  | -0.7708 | -4.2262 | 32.6537  | -34.6715  | 1.6318  | -5.2335  | -279.5751 | -755.8057  | 0.9982 |
|        | 1.5887                | 25.0328 | -6.0887 | 6.7404 | 1.0000  | -0.8138 | -4.0837 | 34.2347  | -35.0565  | 1.2710  | -4.7362  | -294.1401 | -25.2097   | 0.9979 |
|        | 1.5932                | 26.2003 | -6.1229 | 6.7669 | 1.0000  | -0.8645 | -3.9202 | 35.7223  | -34.9148  | 0.8718  | -4.1903  | 307.0182  | 376.8611   | 0.9977 |
|        | 1.6026                | 27.5087 | -6.1833 | 6.8162 | 1.0000  | -0.8987 | -3.8151 | 36.6360  | -34.6579  | 0.6141  | -3.8650  | 315.8194  | -347.5829  | 0.9973 |
|        | 1.6170                | 28.7922 | -6.2724 | 6.8891 | 1.0000  | -0.9374 | -3.6964 | 37.4995  | -34.1217  | 0.3672  | -3.5559  | -322.8414 | -2170.1259 | 0.9970 |
|        | 1.6354                | 30.4110 | -6.3255 | 6.9290 | 1.0000  | -0.9668 | -3.6091 | 38.1574  | -33.7208  | 0.2228  | -3.3997  | -329.2725 | -3248.2696 | 0.9966 |
| 1.6606 | 32.0804               | 6.4395  | -7.0227 | 1.0000 | -1.0030 | -3.4998 | 38.8002 | -32.9728 | 0.0829    | -3.2473 | 336.1250 | 2166.4949 | 0.9961     |        |
| 6.0684 | 1.6181                | 21.9007 | -5.8712 | 6.5069 | 1.0000  | -0.7447 | -4.3119 | 31.6378  | -34.6072  | 2.0753  | -5.7829  | -245.6586 | -1505.6558 | 0.9991 |
|        | 1.6001                | 22.6195 | -5.8857 | 6.5152 | 1.0000  | -0.7727 | -4.2219 | 32.8859  | -35.1092  | 1.7973  | -5.3863  | -261.4435 | 306.7104   | 0.9989 |
|        | 1.5908                | 23.5049 | -5.9313 | 6.5527 | 1.0000  | -0.8176 | -4.0728 | -34.4969 | -144.5823 | 1.4213  | -4.8511  | 279.4265  | -320.6450  | 0.9987 |
|        | 1.5887                | 24.5491 | -5.9607 | 6.5741 | 1.0000  | -0.8659 | -3.9152 | 35.7372  | -34.9160  | 0.9821  | -4.2387  | 295.7207  | -332.5120  | 0.9984 |
|        | 1.5932                | 25.7222 | -6.0050 | 6.6090 | 1.0000  | -0.8900 | -3.8445 | 36.7415  | -34.8554  | 0.7730  | -3.9847  | 304.4112  | -337.4376  | 0.9982 |
|        | 1.6026                | 26.9941 | -6.0730 | 6.6643 | 1.0000  | -0.9209 | -3.7505 | 37.1930  | -34.4446  | 0.5366  | -3.6922  | -313.6461 | 342.5997   | 0.9980 |
|        | 1.6170                | 28.3287 | -6.1371 | 6.7147 | 1.0000  | -0.9522 | -3.6555 | 37.8447  | -33.9236  | 0.3401  | -3.4553  | -320.0493 | -6855.6981 | 0.9976 |

|        |        |         |         |         |        |         |         |           |           |         |         |           |            |        |
|--------|--------|---------|---------|---------|--------|---------|---------|-----------|-----------|---------|---------|-----------|------------|--------|
|        | 1.6354 | 29.7361 | -6.2434 | 6.8014  | 1.0000 | -0.9803 | -3.5706 | 38.3912   | -33.4126  | 0.2044  | -3.3104 | 327.2975  | -347.0998  | 0.9972 |
|        | 1.6606 | 31.2151 | -6.3518 | 6.8892  | 1.0000 | 0.0894  | -3.1961 | -334.2331 | 439.6292  | -1.0090 | -3.4844 | 38.8979   | -122.8196  | 0.9967 |
| 6.9353 | 1.6181 | 21.4429 | -5.7457 | 6.3510  | 1.0000 | -0.7859 | -4.1722 | 33.4069   | -35.4499  | 1.8371  | -5.3651 | -248.1305 | -4746.5680 | 0.9993 |
|        | 1.6001 | 22.2669 | -5.7585 | 6.3597  | 1.0000 | -0.8011 | -4.1319 | 34.1397   | -35.7616  | 1.6682  | -5.1461 | -260.8842 | 303.8199   | 0.9992 |
|        | 1.5908 | 23.1828 | -5.8252 | 6.4149  | 1.0000 | -0.8481 | -3.9774 | 35.4369   | -35.3715  | 1.2173  | -4.5012 | -279.6546 | -402.3562  | 0.9989 |
|        | 1.5887 | 24.1985 | -5.8709 | 6.4501  | 1.0000 | -0.8775 | -3.8861 | 36.2383   | -35.1274  | 0.9577  | -4.1574 | -292.4668 | -5433.2295 | 0.9987 |
|        | 1.5932 | 25.2820 | -5.9351 | 6.5020  | 1.0000 | -0.9086 | -3.7910 | 36.9559   | -34.6768  | 0.6943  | -3.8168 | -302.9788 | -1826.5382 | 0.9985 |
|        | 1.6026 | 26.5589 | -6.0047 | 6.5586  | 1.0000 | -0.9391 | -3.6974 | 37.5815   | -34.1294  | 0.4648  | -3.5324 | 310.8132  | 1823.2281  | 0.9983 |
|        | 1.6170 | 27.8457 | 6.0727  | -6.6111 | 1.0000 | -0.9607 | -3.6329 | 38.0426   | -33.7900  | 0.3379  | -3.3985 | -318.4218 | -3979.4084 | 0.9980 |
|        | 1.6354 | 29.1668 | -6.1754 | 6.6947  | 1.0000 | -0.9861 | -3.5560 | 38.4992   | -33.2682  | 0.2062  | -3.2607 | 325.5334  | -343.4209  | 0.9975 |
|        | 1.6606 | 30.5279 | -6.2979 | 6.7936  | 1.0000 | -1.0111 | -3.4805 | 38.9487   | -32.7808  | 0.1009  | -3.1605 | -332.9361 | 346.8543   | 0.9971 |
| 7.8022 | 1.6181 | 21.1908 | -5.6491 | 6.2285  | 0.9999 | -0.8159 | -4.0787 | 34.4758   | -35.5816  | 1.6163  | -4.9805 | -251.5990 | -1146.6514 | 0.9994 |
|        | 1.6001 | 21.9680 | -5.7022 | 6.2716  | 0.9999 | 1.4341  | -4.7434 | 262.4793  | -571.2965 | -0.8345 | -4.0239 | -35.2041  | 125.7621   | 0.9993 |
|        | 1.5908 | 22.9353 | -5.7456 | 6.3053  | 1.0000 | 1.1693  | -4.3767 | 278.6393  | -584.4128 | -0.8638 | -3.9320 | 35.9738   | -125.4269  | 0.9992 |
|        | 1.5887 | 24.0226 | -5.7684 | 6.3222  | 1.0000 | -0.8917 | -3.8469 | 36.6608   | -35.0578  | 0.8933  | -4.0190 | -290.8986 | -1837.0832 | 0.9990 |
|        | 1.5932 | 25.0193 | -5.8634 | 6.3998  | 1.0000 | -0.9148 | -3.7765 | 37.1699   | -34.6772  | 0.6926  | -3.7727 | -300.6530 | -1470.7598 | 0.9988 |
|        | 1.6026 | 26.1638 | -5.9398 | 6.4608  | 1.0000 | -0.9435 | -3.6872 | 37.7122   | -34.0989  | 0.4791  | -3.5070 | -309.0219 | -2546.6998 | 0.9986 |
|        | 1.6170 | 27.3429 | -6.0338 | 6.5361  | 1.0000 | -0.9644 | -3.6244 | 38.1281   | -33.7186  | 0.3453  | -3.3638 | -316.3318 | -5423.2706 | 0.9983 |
|        | 1.6354 | 28.6778 | -6.1213 | 6.6060  | 1.0000 | -0.9881 | -3.5517 | 38.5386   | -33.2135  | 0.2210  | -3.2364 | -324.6003 | -2898.9101 | 0.9978 |

|        |        |         |         |        |        |         |         |          |           |         |         |           |            |        |
|--------|--------|---------|---------|--------|--------|---------|---------|----------|-----------|---------|---------|-----------|------------|--------|
|        | 1.6606 | 29.9590 | -6.2369 | 6.6990 | 1.0000 | -1.0114 | -3.4813 | 38.9533  | -32.7510  | 0.1218  | -3.1443 | -331.3000 | -6496.3207 | 0.9973 |
| 8.6691 | 1.6181 | 21.0174 | -5.5216 | 6.0813 | 0.9999 | -0.8260 | -4.0539 | 35.0491  | -35.9780  | 1.5541  | -4.8677 | 248.2820  | 1151.9882  | 0.9996 |
|        | 1.6001 | 21.7819 | -5.6222 | 6.1671 | 0.9999 | -0.8490 | -3.9820 | -35.6523 | 215.6749  | 1.3013  | -4.5197 | 263.5169  | -660.0743  | 0.9994 |
|        | 1.5908 | 22.7299 | -5.6803 | 6.2139 | 0.9999 | -0.8757 | -3.8984 | 36.3186  | -35.3293  | 1.0866  | -4.2203 | -277.2146 | -769.4935  | 0.9992 |
|        | 1.5887 | 23.7179 | -5.7381 | 6.2596 | 1.0000 | -0.9018 | -3.8188 | 36.9291  | -34.9342  | 0.8348  | -3.8960 | -289.0792 | -5080.9997 | 0.9991 |
|        | 1.5932 | 24.7688 | -5.7990 | 6.3078 | 1.0000 | -0.9242 | -3.7492 | 37.3618  | -34.4652  | 0.6461  | -3.6628 | -298.4657 | 324.6539   | 0.9989 |
|        | 1.6026 | 25.8677 | -5.8688 | 6.3622 | 1.0000 | -0.9483 | -3.6758 | 37.8439  | -34.0382  | 0.4791  | -3.4662 | -307.4811 | -749.8593  | 0.9986 |
|        | 1.6170 | 26.9565 | -5.9792 | 6.4520 | 1.0000 | -0.9685 | -3.6142 | 38.2280  | -33.6565  | 0.3464  | -3.3267 | -315.4035 | -9025.4595 | 0.9984 |
|        | 1.6354 | 28.2630 | -6.0653 | 6.5204 | 1.0000 | -0.9896 | -3.5494 | 38.5958  | -33.2175  | 0.2395  | -3.2200 | -322.6206 | -8662.3282 | 0.9980 |
|        | 1.6606 | 29.4537 | -6.1905 | 6.6216 | 1.0000 | -1.0117 | -3.4821 | 38.9652  | -32.7484  | 0.1391  | -3.1276 | -330.4651 | -6498.2005 | 0.9974 |
| 9.5360 | 1.6181 | 20.7208 | -5.5383 | 6.0666 | 0.9999 | 1.5401  | -4.8055 | 246.6743 | -554.8033 | -0.8336 | -4.0337 | -35.3533  | 126.0668   | 0.9997 |
|        | 1.6001 | 21.6179 | -5.5814 | 6.1010 | 0.9999 | -0.8571 | -3.9616 | 36.0029  | -35.8136  | 1.3004  | -4.4777 | 261.0251  | 1504.0059  | 0.9995 |
|        | 1.5908 | 22.5387 | -5.6328 | 6.1413 | 0.9999 | -0.8825 | -3.8826 | 36.5828  | -35.3564  | 1.0281  | -4.1106 | -274.8592 | -413.9185  | 0.9994 |
|        | 1.5887 | 23.4938 | -5.6940 | 6.1896 | 0.9999 | -0.9084 | -3.8003 | 37.0643  | -34.7729  | 0.8133  | -3.8239 | -287.4908 | -1124.6479 | 0.9992 |
|        | 1.5932 | 24.5124 | -5.7500 | 6.2328 | 0.9999 | -0.9301 | -3.7342 | 37.5296  | -34.4237  | 0.6380  | -3.6122 | -296.8322 | -5078.5215 | 0.9990 |
|        | 1.6026 | 25.6345 | -5.8212 | 6.2896 | 1.0000 | -0.9506 | -3.6712 | 37.9126  | -34.0133  | 0.4849  | -3.4418 | 306.4633  | 32.1215    | 0.9988 |
|        | 1.6170 | 26.7043 | -5.9254 | 6.3734 | 1.0000 | -0.9682 | -3.6175 | 38.2511  | -33.6885  | 0.3758  | -3.3327 | -314.1994 | -2907.9083 | 0.9985 |
|        | 1.6354 | 27.8085 | -6.0437 | 6.4689 | 1.0000 | -0.9890 | -3.5531 | 38.6013  | -33.2441  | 0.2588  | -3.2131 | -321.6034 | -1464.2913 | 0.9981 |
|        | 1.6606 | 29.0168 | -6.1558 | 6.5579 | 1.0000 | -1.0110 | -3.4857 | 38.9585  | -32.7598  | 0.1555  | -3.1126 | -329.2275 | -2180.5474 | 0.9976 |

|         |        |         |         |        |        |         |         |           |          |         |         |           |            |        |
|---------|--------|---------|---------|--------|--------|---------|---------|-----------|----------|---------|---------|-----------|------------|--------|
| 10.4029 | 1.6181 | 20.6114 | -5.4907 | 5.9982 | 0.9999 | -0.8482 | -3.9910 | 35.8080   | -35.9486 | 1.4061  | -4.5775 | 248.5586  | 1155.9999  | 0.9997 |
|         | 1.6001 | 21.4759 | -5.5388 | 6.0364 | 0.9999 | -0.8695 | -3.9252 | 36.3309   | -35.6395 | 1.1969  | -4.2936 | -261.2070 | -1146.3978 | 0.9995 |
|         | 1.5908 | 22.3675 | -5.5872 | 6.0741 | 0.9999 | -0.8909 | -3.8581 | 36.7839   | -35.1929 | 0.9658  | -3.9879 | 272.9608  | -301.9043  | 0.9994 |
|         | 1.5887 | 23.3211 | -5.6334 | 6.1097 | 0.9999 | -0.9086 | -3.8040 | 37.1670   | -34.8969 | 0.8202  | -3.8140 | -284.1443 | -1849.4827 | 0.9992 |
|         | 1.5932 | 24.3370 | -5.6950 | 6.1566 | 0.9999 | -0.9288 | -3.7422 | 37.5839   | -34.5439 | 0.6632  | -3.6258 | -294.6766 | -6521.8356 | 0.9991 |
|         | 1.6026 | 25.2927 | -5.8007 | 6.2425 | 1.0000 | -0.9486 | -3.6802 | 37.9255   | -34.1112 | 0.5120  | -3.4525 | -304.1801 | -2915.3945 | 0.9989 |
|         | 1.6170 | 26.3979 | -5.8868 | 6.3103 | 1.0000 | -0.9682 | -3.6191 | 38.2598   | -33.6840 | 0.3934  | -3.3236 | -312.0645 | -1471.3047 | 0.9985 |
|         | 1.6354 | 27.4572 | -6.0048 | 6.4050 | 1.0000 | 0.2756  | -3.2052 | -321.0175 | 424.3468 | -0.9889 | -3.5550 | 38.6222   | -123.2750  | 0.9982 |
|         | 1.6606 | 28.6006 | -6.1269 | 6.5028 | 1.0000 | -1.0099 | -3.4901 | 38.9668   | -32.8316 | 0.1742  | -3.1056 | -329.2318 | -380.9657  | 0.9976 |

**Table S2.** The values of the parameters of the Eqs. (1) and (2) for the Ar-C(CNT) RDFs.

| $T^*$  | $\rho_{\text{mix}}^*$ | $s_1$   | $m_1$   | $n_1$  | $R^2$   | $a_1$   | $b_1$   | $c_1$    | $d_1$     | $q_1$   | $h_1$     | $k_1$     | $l_1$      | $R^2$  |
|--------|-----------------------|---------|---------|--------|---------|---------|---------|----------|-----------|---------|-----------|-----------|------------|--------|
| 5.2015 | 1.6181                | 4.6634  | -5.0863 | 5.8911 | 1.0000  | -0.8983 | -3.2222 | 32.2161  | -33.1807  | 0.2902  | -1.7641   | -236.3780 | -78.0274   | 0.9993 |
|        | 1.6001                | 4.5211  | -5.0695 | 5.8718 | 1.0000  | -0.9442 | -3.0693 | 33.4474  | -34.5648  | 0.2016  | -1.6601   | -239.8518 | -1874.8552 | 0.9982 |
|        | 1.5908                | 4.3900  | -5.1077 | 5.9028 | 1.0000  | -0.9828 | -2.9435 | 34.3969  | -35.7283  | 0.1739  | -1.6524   | -244.3495 | -70.1762   | 0.9959 |
|        | 1.5887                | 4.3092  | -5.1397 | 5.9276 | 1.0000  | -1.0159 | -2.8357 | 35.1743  | -36.5818  | 0.1424  | -1.6147   | 250.6852  | 1863.4650  | 0.9910 |
|        | 1.5932                | 4.2287  | -5.1851 | 5.9624 | 1.0000  | -1.0448 | -2.7425 | 35.8412  | -37.3289  | 0.0995  | -1.5679   | -257.5116 | 303.5524   | 0.9820 |
|        | 1.6026                | 4.2607  | -5.1701 | 5.9436 | 1.0000  | -1.0697 | -2.6614 | 36.3874  | -37.8031  | 0.0690  | -1.5192   | 265.7982  | 47.7778    | 0.9701 |
|        | 1.6170                | 4.2920  | -5.2135 | 5.9767 | 1.0000  | -1.0926 | -2.5869 | 36.9003  | -38.1805  | 0.0243  | -1.4541   | -275.5201 | -3637.6099 | 0.9557 |
|        | 1.6354                | 4.3217  | -5.2709 | 6.0201 | 1.0000  | -1.1232 | -2.4864 | 37.4736  | -38.2407  | -0.0862 | -1.2634   | 290.6106  | -698.9491  | 0.9404 |
| 1.6606 | 4.4020                | -5.3154 | 6.0504  | 1.0000 | -1.1459 | -2.4128 | 37.9404 | -38.3192 | -0.1688   | -1.1291 | -302.0476 | 350.4546  | 0.9277     |        |
| 6.0684 | 1.6181                | 4.2638  | -4.8767 | 5.6697 | 0.9999  | 0.1899  | -1.5476 | 230.2825 | -542.3151 | -0.9472 | -3.0619   | 33.4050   | 235.4479   | 0.9988 |
|        | 1.6001                | 4.1594  | -4.8923 | 5.6790 | 0.9999  | -0.9817 | -2.9489 | 34.3022  | -35.6386  | 0.1336  | -1.5027   | -233.4589 | -8364.7824 | 0.9973 |
|        | 1.5908                | 4.1094  | -4.9069 | 5.6886 | 0.9999  | -1.0134 | -2.8458 | 35.0540  | -36.4921  | 0.1095  | -1.4848   | -240.0111 | -1157.6797 | 0.9941 |
|        | 1.5887                | 4.0561  | -4.9498 | 5.7218 | 1.0000  | -1.0330 | -2.7832 | 35.5575  | -37.2176  | 0.1172  | -1.5365   | 243.9107  | 793.7926   | 0.9894 |
|        | 1.5932                | 4.0589  | -4.9827 | 5.7468 | 0.9999  | -1.0576 | -2.7031 | 36.1299  | -37.8104  | 0.1116  | -1.5398   | -251.6692 | -1144.9124 | 0.9804 |
|        | 1.6026                | 4.0825  | -5.0102 | 5.7654 | 1.0000  | -1.0766 | -2.6416 | 36.5443  | -38.2103  | 0.0942  | -1.5202   | -259.4212 | -1137.0979 | 0.9698 |
|        | 1.6170                | 4.1170  | -5.0638 | 5.8066 | 1.0000  | -1.0971 | -2.5744 | 36.9830  | -38.4737  | 0.0654  | -1.4755   | 269.9432  | 1845.6319  | 0.9570 |

|        |        |        |         |        |        |         |         |         |          |         |         |           |            |        |
|--------|--------|--------|---------|--------|--------|---------|---------|---------|----------|---------|---------|-----------|------------|--------|
|        | 1.6354 | 4.1698 | -5.1079 | 5.8369 | 0.9999 | -1.1158 | -2.5131 | 37.3735 | -38.6097 | 0.0135  | -1.3954 | -280.6385 | -1114.4882 | 0.9447 |
|        | 1.6606 | 4.2597 | -5.1651 | 5.8791 | 1.0000 | -1.1359 | -2.4471 | 37.7789 | -38.6447 | -0.0616 | -1.2788 | 293.5361  | -339.0225  | 0.9319 |
| 6.9353 | 1.6181 | 4.0068 | -4.7114 | 5.4938 | 0.9999 | -0.9794 | -2.9572 | 34.1455 | -35.3316 | 0.0977  | -1.3321 | -227.1680 | -1174.4642 | 0.9981 |
|        | 1.6001 | 3.9453 | -4.7157 | 5.9430 | 0.9999 | -1.0066 | -2.8694 | 34.8389 | -36.2412 | 0.0633  | -1.3307 | 230.9017  | -628.8595  | 0.9963 |
|        | 1.5908 | 3.9195 | -4.7528 | 5.5227 | 0.9999 | -1.0278 | -2.8015 | 35.3780 | -37.0446 | 0.0951  | -1.4305 | -234.1906 | 272.8136   | 0.9933 |
|        | 1.5887 | 3.9289 | -4.7797 | 5.5425 | 0.9999 | -1.0482 | -2.7354 | 35.8501 | -37.6011 | 0.1085  | -1.4772 | -240.5800 | -2959.3337 | 0.9884 |
|        | 1.5932 | 3.9091 | -4.8294 | 5.5798 | 0.9999 | -1.0649 | -2.6818 | 36.2739 | -38.1546 | 0.1069  | -1.5039 | -246.3151 | -73.4049   | 0.9806 |
|        | 1.6026 | 3.9482 | -4.8645 | 5.6049 | 0.9999 | -1.0797 | -2.6337 | 36.6095 | -38.4947 | 0.1124  | -1.5260 | 253.7978  | 2225.5069  | 0.9721 |
|        | 1.6170 | 4.0257 | -4.8809 | 5.6126 | 0.9999 | -1.0957 | -2.5811 | 36.9919 | -38.7866 | 0.1135  | -1.5332 | -263.4526 | -1855.0939 | 0.9607 |
|        | 1.6354 | 4.0992 | -4.9323 | 5.6501 | 0.9999 | -1.1112 | -2.5299 | 37.3211 | -38.9054 | 0.0814  | -1.4838 | -273.3701 | -7604.7360 | 0.9493 |
|        | 1.6606 | 4.1847 | -4.9856 | 5.6876 | 0.9999 | -1.1319 | -2.4615 | 37.7252 | -38.8739 | 0.0120  | -1.3645 | 287.7784  | 1109.1596  | 0.9366 |
| 7.8022 | 1.6181 | 3.8038 | -4.5814 | 5.3538 | 0.9999 | -1.0034 | -2.8807 | 34.6747 | -35.9942 | 0.0163  | -1.1711 | -220.9461 | 614.3017   | 0.9996 |
|        | 1.6001 | 3.7912 | -4.5952 | 5.3625 | 0.9999 | -1.0227 | -2.8189 | 35.1732 | -36.7311 | 0.0571  | -1.2882 | 226.7019  | 1178.3451  | 0.9958 |
|        | 1.5908 | 3.7962 | -4.6148 | 5.3758 | 0.9999 | -1.0394 | -2.7657 | 35.6016 | -37.3823 | 0.0716  | -1.3639 | -229.4696 | -95.1481   | 0.9932 |
|        | 1.5887 | 3.7682 | -4.6778 | 5.4260 | 0.9999 | -1.0569 | -2.7093 | 36.0544 | -37.9987 | 0.0935  | -1.4336 | -235.0944 | -808.4147  | 0.9879 |
|        | 1.5932 | 3.8401 | -4.6692 | 5.4131 | 0.9999 | -1.0679 | -2.6743 | 36.3405 | -38.4339 | 0.1125  | -1.4976 | 240.5556  | 5482.7807  | 0.9823 |
|        | 1.6026 | 3.8713 | -4.7393 | 5.4689 | 0.9999 | -1.0803 | -2.6336 | 36.6472 | -38.7239 | 0.1360  | -1.5458 | -248.4048 | -1513.7122 | 0.9741 |
|        | 1.6170 | 3.9224 | -4.7888 | 5.5045 | 0.9999 | -1.0945 | -2.5869 | 36.9647 | -38.9553 | 0.1325  | -1.5502 | 257.4558  | -296.3440  | 0.9646 |
|        | 1.6354 | 4.0196 | -4.8224 | 5.5261 | 0.9999 | -1.1059 | -2.5489 | 37.2276 | -39.0769 | 0.1300  | -1.5487 | -266.8561 | -1133.8177 | 0.9548 |



|        |        |        |         |         |        |         |         |         |          |           |         |           |            |        |
|--------|--------|--------|---------|---------|--------|---------|---------|---------|----------|-----------|---------|-----------|------------|--------|
|        | 1.6606 | 4.1154 | -4.8581 | 5.5477  | 0.9999 | -1.1240 | -2.4885 | 37.5926 | -39.0839 | 0.0906    | -1.4758 | -279.8460 | -39.7152   | 0.9418 |
| 8.6691 | 1.6181 | 3.6369 | -4.4668 | 5.2299  | 0.9999 | -1.0188 | -2.8328 | 34.9970 | -36.4693 | -0.0140   | -1.1000 | -216.0504 | -834.9509  | 0.9973 |
|        | 1.6001 | 3.6535 | -4.4867 | 5.2441  | 0.9999 | -1.0329 | -2.7876 | 35.3736 | -37.0611 | 0.0209    | -1.2103 | -221.0440 | -1548.2956 | 0.9959 |
|        | 1.5908 | 3.6526 | -4.5366 | 5.2835  | 0.9999 | -1.0471 | -2.7420 | 35.7577 | -37.6434 | 0.0492    | -1.3063 | 225.3063  | 462.4640   | 0.9931 |
|        | 1.5887 | 3.6780 | -4.5441 | 5.2842  | 0.9999 | -1.0605 | -2.6996 | 36.1225 | -38.2361 | 0.0823    | -1.4028 | -229.4016 | -8017.6841 | 0.9892 |
|        | 1.5932 | 3.7355 | -4.5847 | 5.3154  | 0.9999 | -1.0680 | -2.6757 | 36.3610 | -38.6589 | 0.1350    | -1.5278 | -235.5607 | -450.2470  | 0.9842 |
|        | 1.6026 | 3.7928 | -4.6173 | 5.3373  | 0.9999 | -1.0803 | -2.6352 | 36.6450 | -38.9187 | 0.1411    | -1.5499 | -243.1803 | -1161.9675 | 0.9776 |
|        | 1.6170 | 3.8802 | -4.6357 | 5.3458  | 0.9999 | -1.0929 | -2.5936 | 36.9482 | -39.1361 | 0.1613    | -1.5808 | -252.1142 | -5111.6592 | 0.9686 |
|        | 1.6354 | 3.9719 | -4.6899 | 5.3858  | 0.9999 | -1.1061 | -2.5492 | 37.2434 | -39.2280 | 0.1645    | -1.5841 | -263.3955 | -1858.9276 | 0.9584 |
|        | 1.6606 | 4.0566 | -4.7621 | 5.4398  | 0.9999 | -1.1193 | -2.5050 | 37.5140 | -39.2363 | 0.1422    | -1.5457 | 275.1089  | 46.4807    | 0.9471 |
| 9.5360 | 1.6181 | 3.5457 | -4.3610 | 5.1177  | 0.9999 | -1.0239 | -2.8181 | 35.0829 | -36.7060 | -0.0409   | -1.0551 | -209.4966 | -1926.7072 | 0.9975 |
|        | 1.6001 | 3.5564 | -4.3974 | 5.1468  | 0.9999 | -1.0409 | -2.7638 | 35.5618 | -37.4448 | 1.9000e-3 | -1.1867 | -216.1281 | -4796.9733 | 0.9954 |
|        | 1.5908 | 3.5841 | -4.4043 | 5.1469  | 0.9999 | -1.0544 | -2.7206 | 35.9070 | -37.9587 | 0.0282    | -1.2681 | -220.2756 | -1191.3487 | 0.9936 |
|        | 1.5887 | 3.6202 | -4.4508 | 5.1831  | 0.9999 | -1.0605 | -2.7014 | 36.1264 | -38.3983 | 0.0838    | -1.4054 | -224.7346 | 254.4144   | 0.9900 |
|        | 1.5932 | 3.6506 | -4.5021 | 5.2216  | 0.9999 | -1.0713 | -2.6662 | 36.4077 | -38.7846 | 0.1166    | -1.4852 | -231.5935 | -7296.9111 | 0.9860 |
|        | 1.6026 | 3.7347 | -4.5224 | 5.2332  | 0.9999 | -1.0805 | -2.6360 | 36.6531 | -39.0631 | 0.1676    | -1.5757 | 239.3209  | 1527.7387  | 0.9798 |
|        | 1.6170 | 3.8212 | 4.5494  | -5.2494 | 0.9999 | -1.0917 | -2.5986 | 36.9267 | -39.2666 | 0.1860    | -1.6122 | -248.0225 | -4397.7658 | 0.9723 |
|        | 1.6354 | 3.8857 | -4.6313 | 5.3124  | 0.9999 | -1.1016 | -2.5654 | 37.1521 | -39.3459 | 0.2008    | -1.6343 | 257.6765  | -293.1049  | 0.9632 |
|        | 1.6606 | 4.0021 | -4.6645 | 5.3322  | 0.9999 | -1.1137 | -2.5246 | 37.4201 | -39.3944 | 0.1966    | -1.6249 | 268.7225  | 414.8760   | 0.9526 |

|         |        |        |         |         |        |         |         |         |          |         |         |           |            |        |
|---------|--------|--------|---------|---------|--------|---------|---------|---------|----------|---------|---------|-----------|------------|--------|
| 10.4029 | 1.6181 | 3.4431 | -4.2850 | 5.0337  | 0.9999 | -1.0328 | -2.7914 | 35.2602 | -37.0496 | -0.0654 | -1.0201 | -204.7235 | 224.0477   | 0.9974 |
|         | 1.6001 | 3.4736 | -4.2991 | 5.0419  | 0.9999 | -1.0468 | -2.7461 | 35.6566 | -37.6070 | -0.0364 | -1.1124 | -210.3732 | -6607.4544 | 0.9962 |
|         | 1.5908 | 3.5008 | -4.3427 | 5.0753  | 0.9999 | -1.0590 | -2.7064 | 35.9938 | -38.0826 | 0.0136  | -1.2263 | 217.9978  | 1196.3393  | 0.9939 |
|         | 1.5887 | 3.5765 | -4.3434 | 5.0714  | 0.9999 | -1.0645 | -2.6894 | 36.1995 | -38.5652 | 0.0787  | -1.3864 | -222.0644 | -110.6573  | 0.9912 |
|         | 1.5932 | 3.5996 | 4.4042  | -5.1170 | 0.9999 | -1.0741 | -2.6583 | 36.4516 | -38.9114 | 0.1219  | -1.4755 | -227.7626 | 256.6154   | 0.9871 |
|         | 1.6026 | 3.6867 | -4.4398 | 5.1424  | 0.9999 | -1.0804 | -2.6373 | 36.6513 | -39.1868 | 0.1797  | -1.5882 | -235.5000 | -1533.6323 | 0.9820 |
|         | 1.6170 | 3.7737 | 4.4782  | -5.1683 | 0.9999 | -1.0896 | -2.6066 | 36.8923 | -39.3763 | 0.2061  | -1.6399 | -243.5619 | -1164.1510 | 0.9746 |
|         | 1.6354 | 3.8596 | -4.5235 | 5.1989  | 0.9999 | -1.0998 | -2.5719 | 37.1253 | -39.4633 | 0.2305  | -1.6720 | -253.6250 | -7272.6522 | 0.9670 |
|         | 1.6606 | 3.9596 | -4.5793 | 5.2384  | 0.9999 | -1.1109 | -2.5344 | 37.3707 | -39.4893 | 0.2306  | -1.6682 | 264.4829  | -299.2640  | 0.9562 |

## 2- Testing the equilibration

In order to find the proper equilibration time in which the maximum number of the argon atoms enter to the nanotube can be obtained, one (33,0) CNT was immersed in an equilibrated periodic LJ fluid reservoir containing 8000 argon atoms. Without any filling, an initial optimization at the pressure of 1 atm and the temperature of 300 K was performed and the argon atoms were allowed to fill into the nanopore from the bulk outer fluid for 1, 3, 5, 7, and 10 ns. After completing the filing process, we determined the number of the confined atoms and presented them in the Fig. S2:

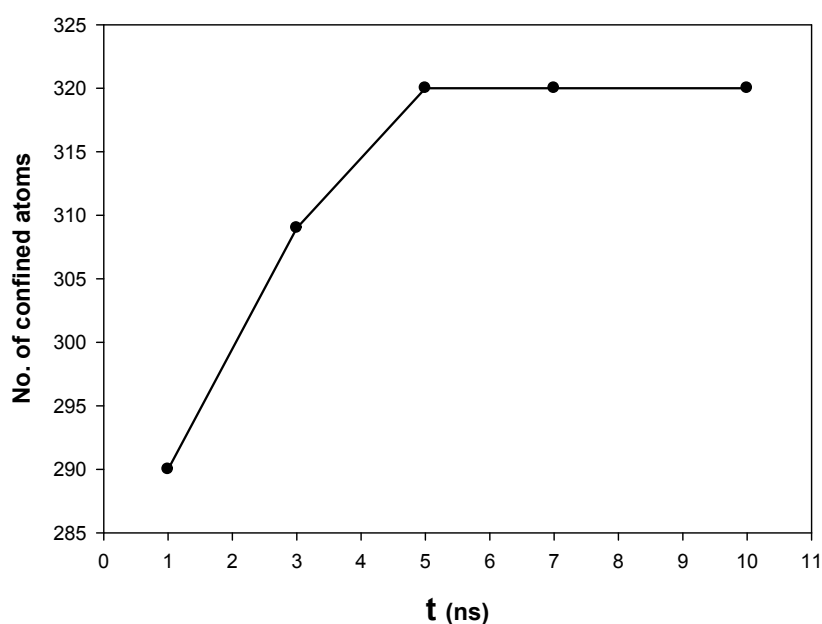

**Fig. S2.** The number of the confined atoms into the (33,0) CNT at different equilibration times

According to Fig. S2, after 5 ns, the number of the confined atoms do not change. Therefore, the equilibration time of 5 ns is the optimum (by considering the smallest computational cost). We have also compared the Ar-Ar RDF of the confined atoms at two equilibration times of 5 and 10 ns in Fig. S3:

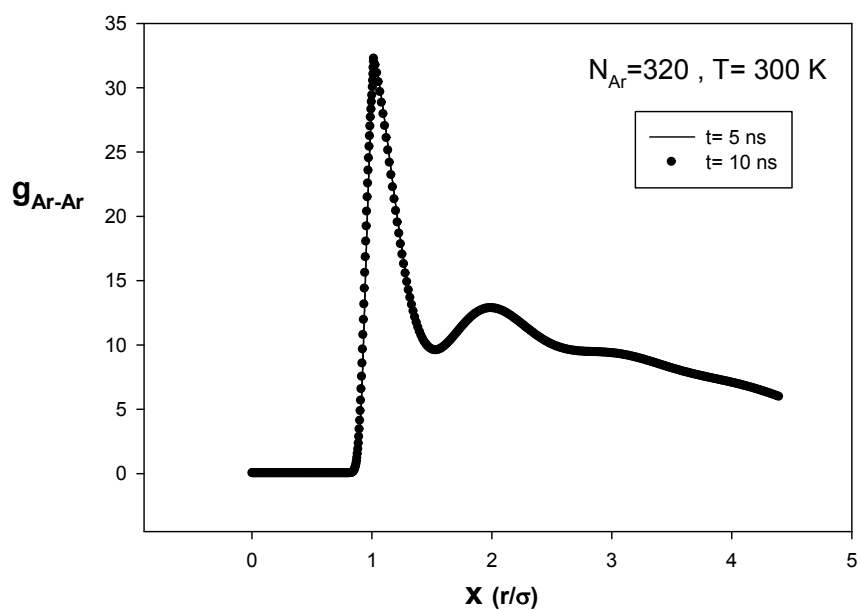

**Fig. S3.** Comparison between the Ar-Ar RDF of the confined atoms at two equilibration times of 5 and 10 ns.

According to Fig. S2, the RDF values at the time larger than the equilibrium (10 ns) are the same as those results at the equilibration time (5 ns). Therefore, the 5 ns is the optimum time for the equilibration step.
